# Supplementary material for: Trifluridine/tipiracil in combination with oxaliplatin and either bevacizumab or nivolumab in metastatic colorectal cancer: a dose-expansion, phase I study
Source: PubMed Central journal article supplement — ESMO Open. 2021 Sep 20;6(5):100270. doi: 10.1016/j.esmoop.2021.100270 (PMC8453191; doi:10.1016/j.esmoop.2021.100270), 2021-09-20
Supplement: mmc4.pdf [file mmc4.pdf]

# Heat Map of Z-score for genes expression related to Inflammatory

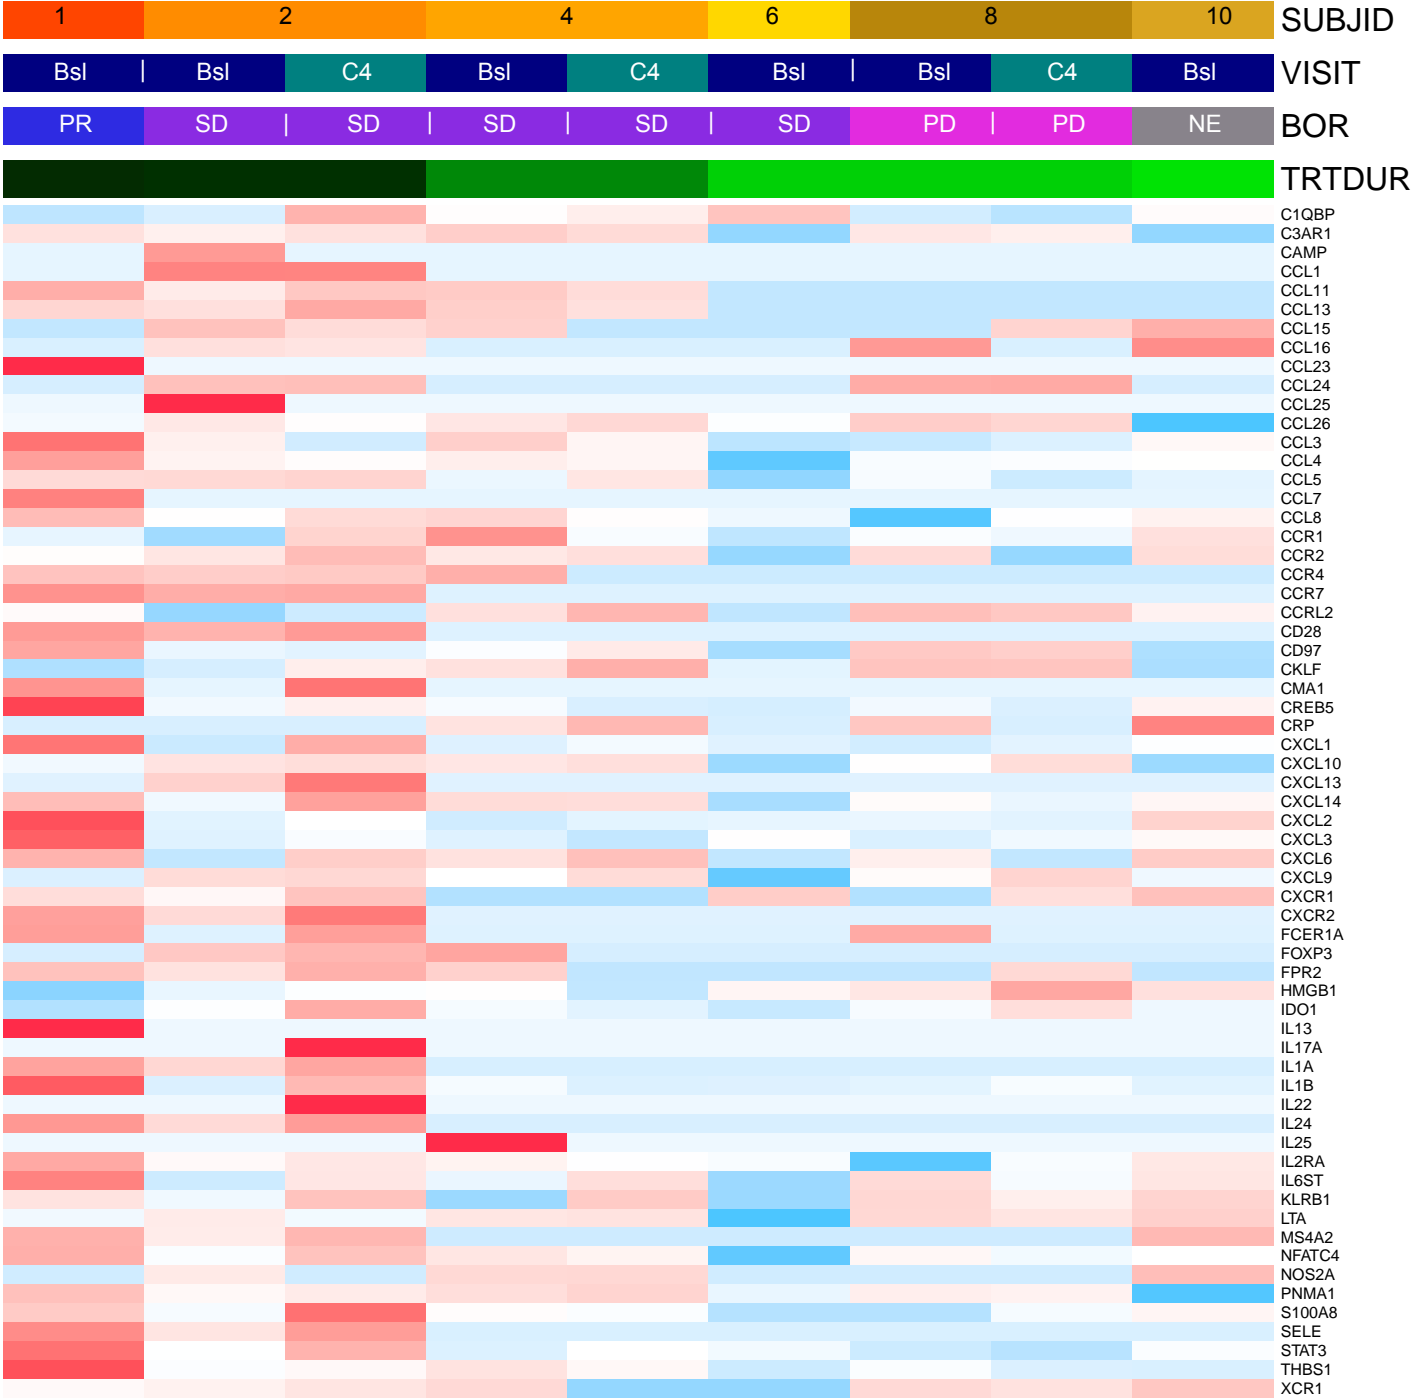

**Visit**  
 Baseline  
 End of cycle 4

**BOR**  
 PR  
 SD  
 PD  
 NE

**Treatment duration (weeks)**  
 100  
 80  
 60  
 40  
 20  
 0

**Z-Score**  
 3  
 2  
 1  
 0  
 -1  
 -2  
 -3
