# Supplementary figures and images for: Trifluridine/tipiracil in combination with oxaliplatin and either bevacizumab or nivolumab in metastatic colorectal cancer: a dose-expansion, phase I study
Source: PubMed Central journal article supplement — ESMO Open. 2021 Sep 20;6(5):100270. doi: 10.1016/j.esmoop.2021.100270 (PMC8453191; doi:10.1016/j.esmoop.2021.100270), 2021-09-20

### Global Heat Map for Biomarker parameters

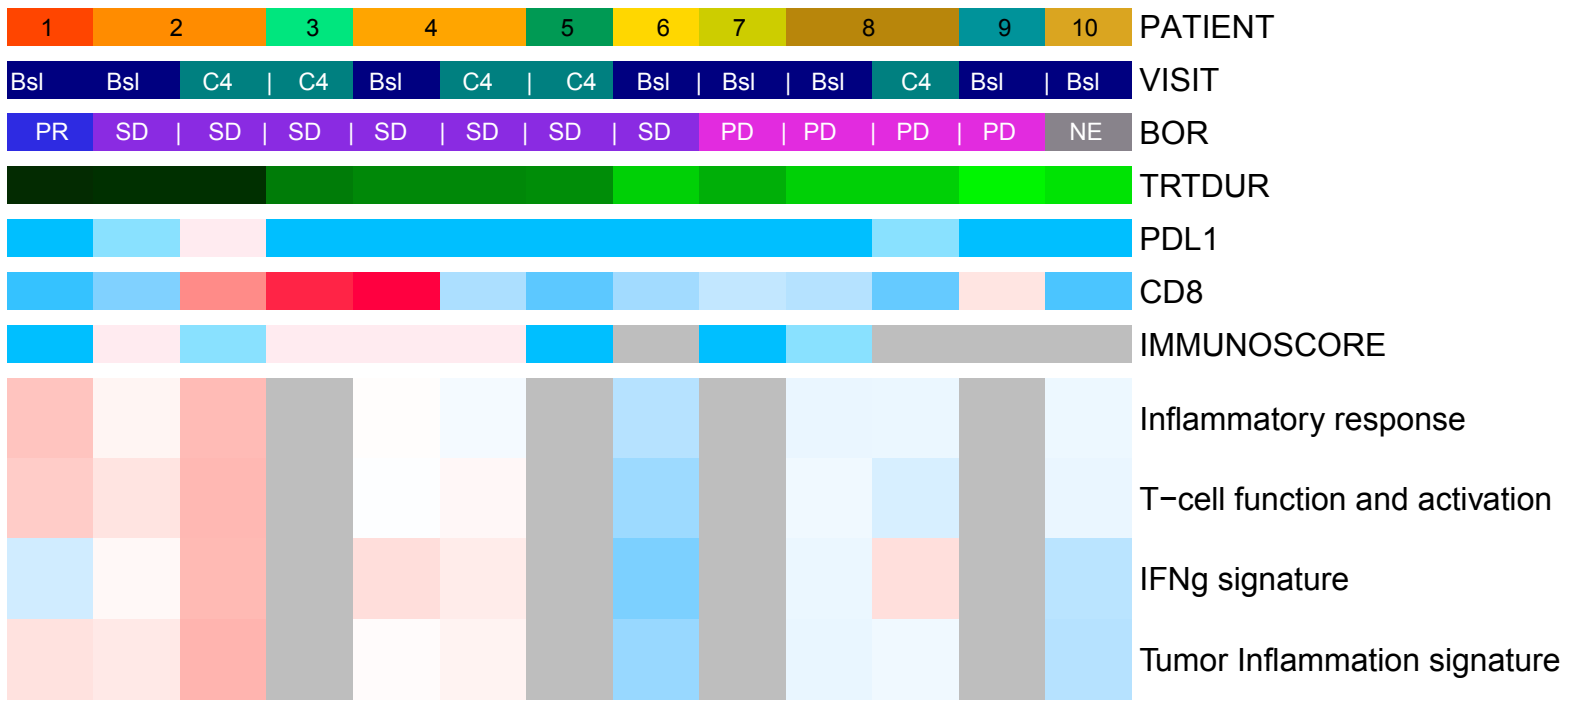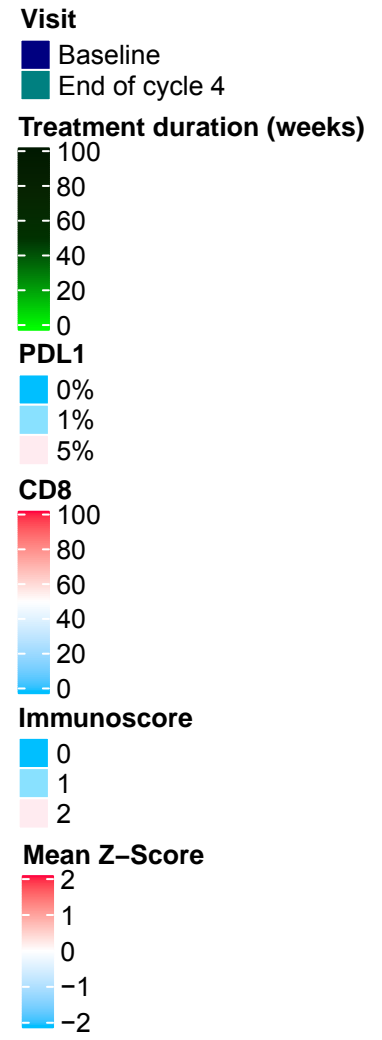

Supplement: mmc3.pdf [file mmc3.pdf]

# Heat Map of Z-score for genes exp. related to T-cell function and activation

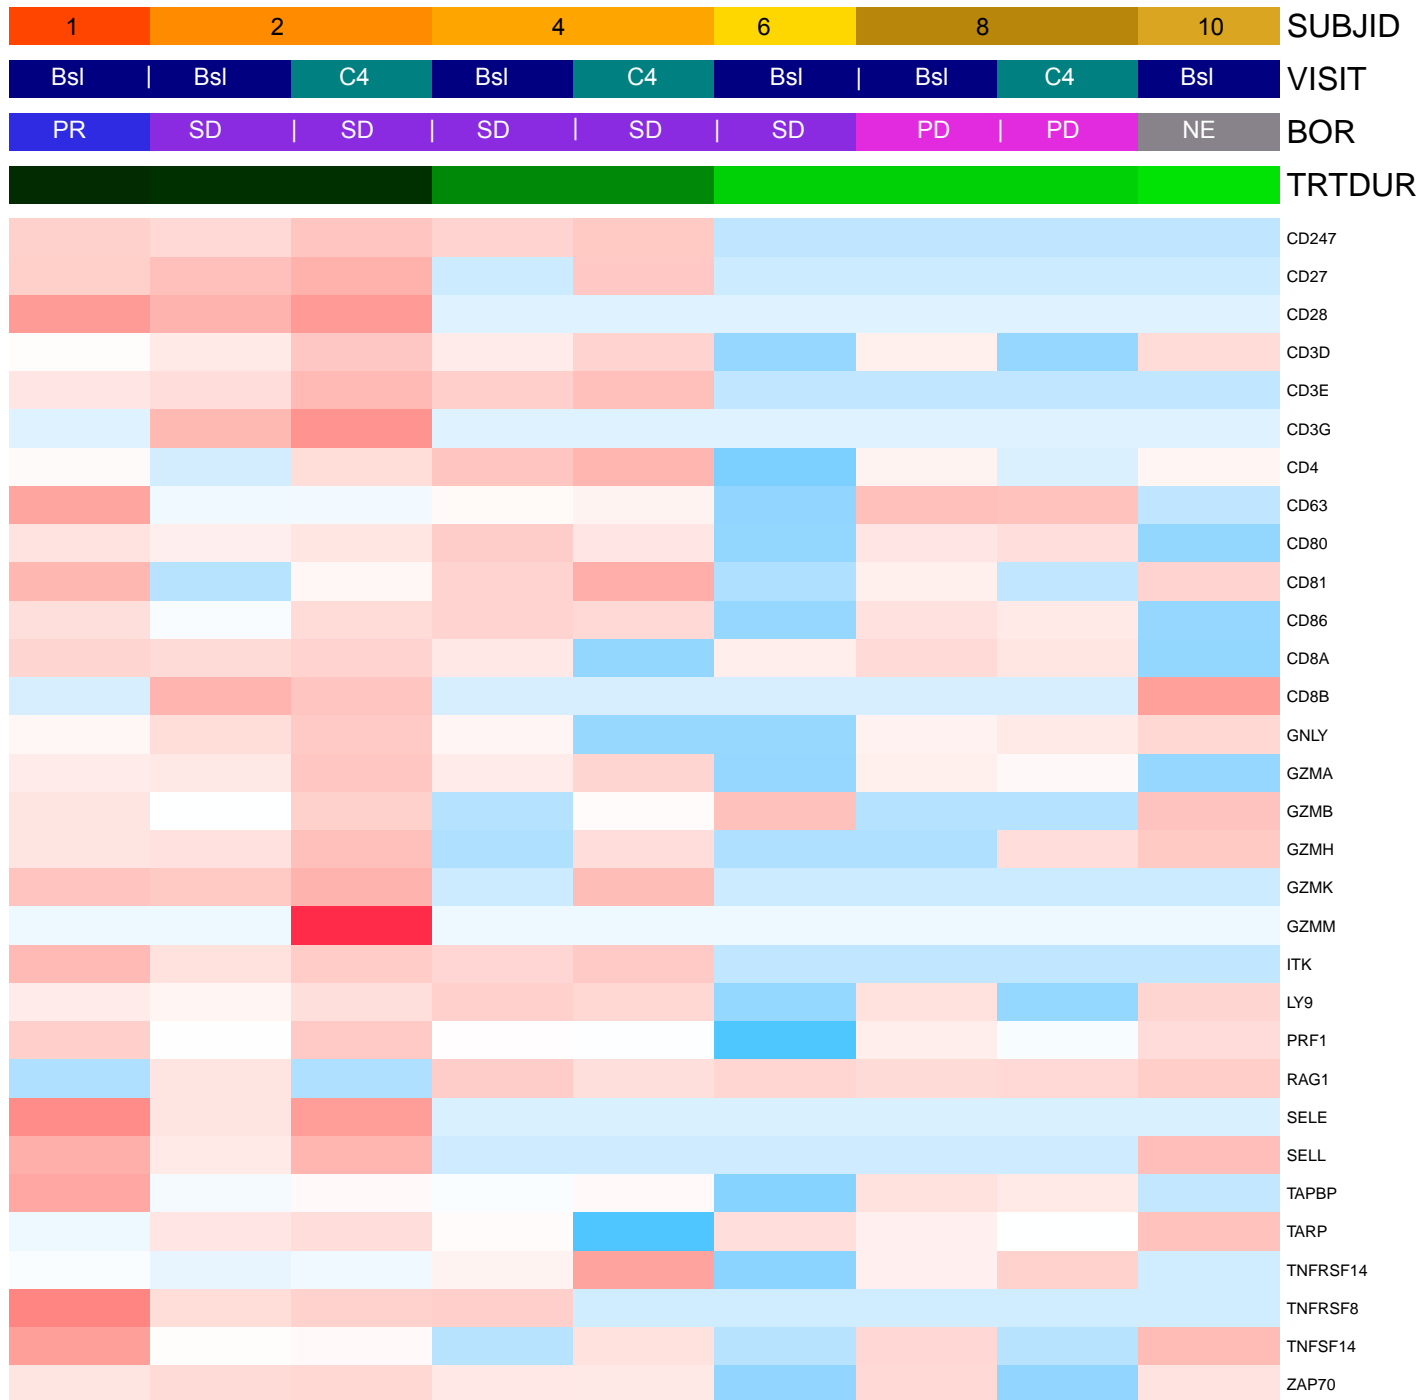

Supplement: mmc5.pdf [file mmc5.pdf]

Heat Map of Z-score for genes exp. related to IFNg signature

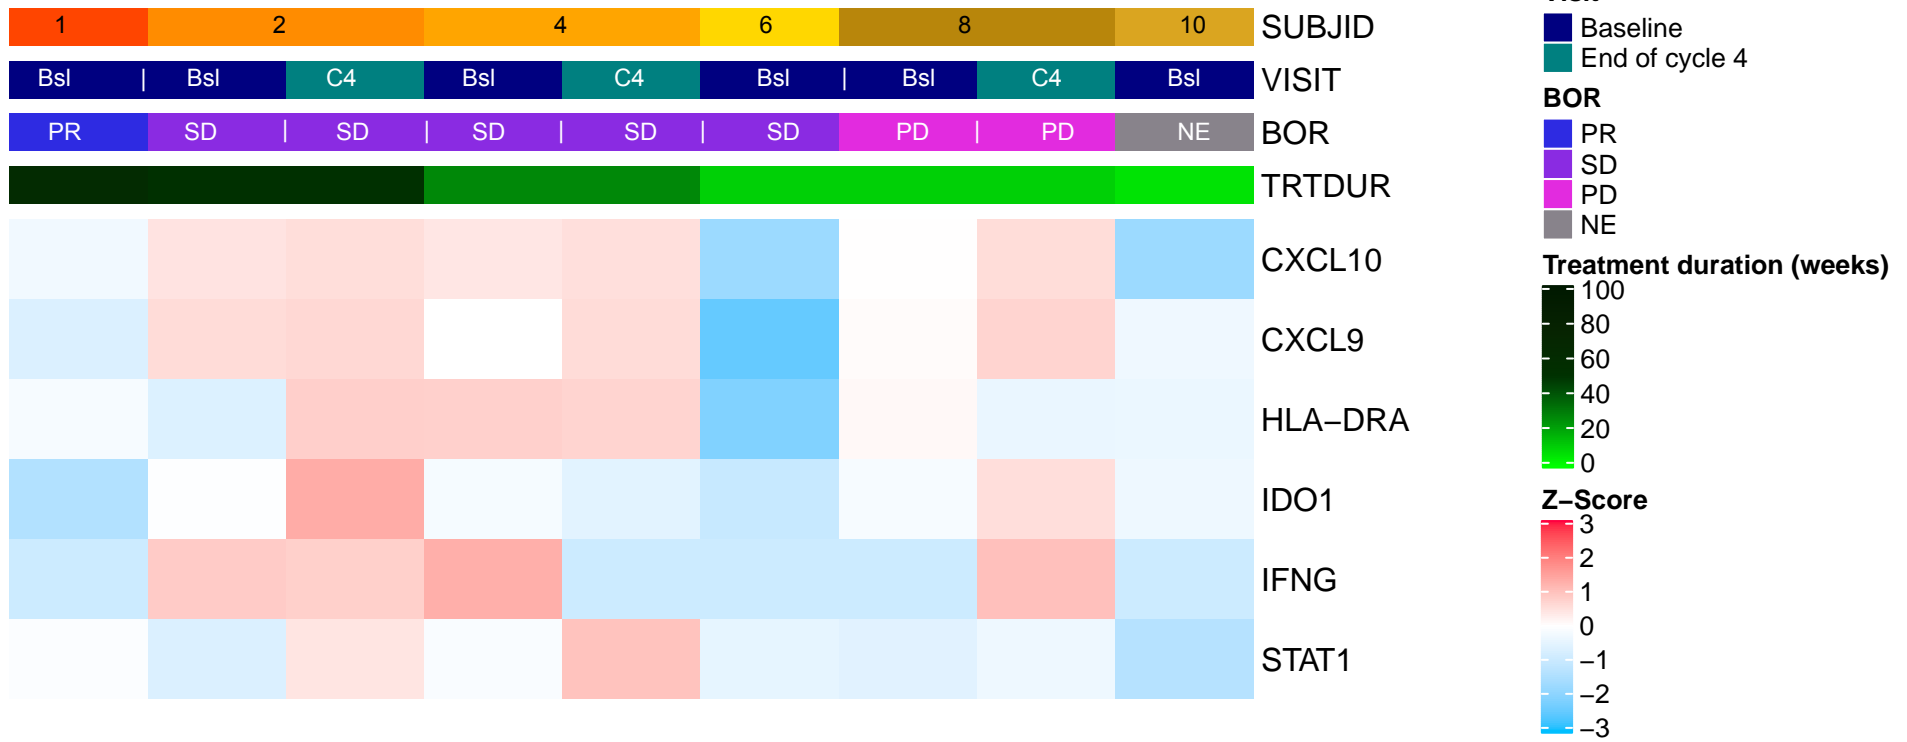

Supplement: mmc6.pdf [file mmc6.pdf]

# Heat Map of Z-score for genes exp. related to Tumor Inflammation signature

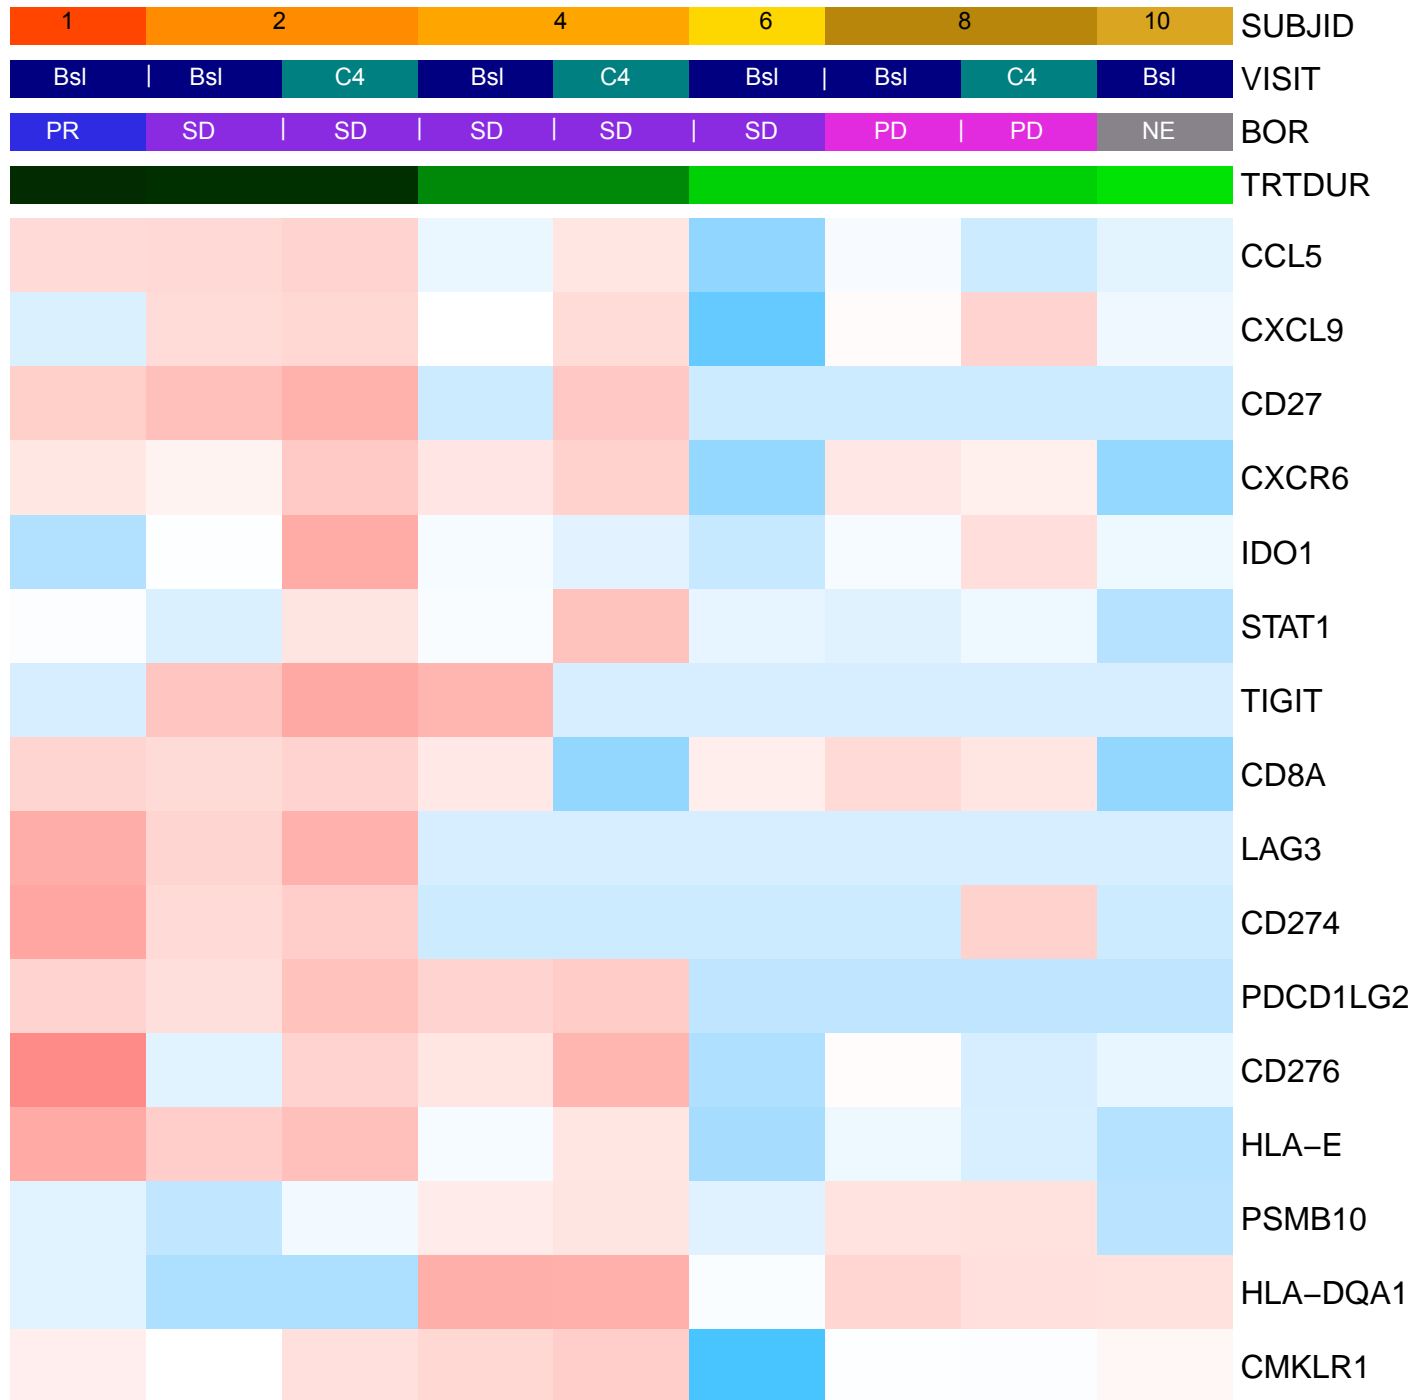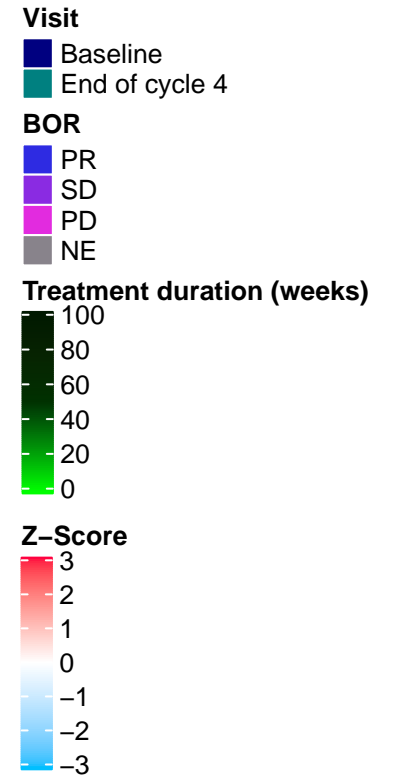

Supplement: mmc7.pdf [file mmc7.pdf]
